# Supplementary material for: Global sensitivity analysis of GEOS-Chem modeled ozone and hydrogen oxides during the INTEX campaigns
Source: Copernicus journal article supplement (doi:10.5194/acp-18-2443-2018), 2018-02-19
Supplement: Supplementary file 1 [file acp-18-2443-2018-supplement.pdf]

Supplement of Atmos. Chem. Phys., 18, 2443–2460, 2018  
<https://doi.org/10.5194/acp-18-2443-2018-supplement>  
© Author(s) 2018. This work is distributed under  
the Creative Commons Attribution 4.0 License.

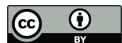

*Supplement of*

## **Global sensitivity analysis of GEOS-Chem modeled ozone and hydrogen oxides during the INTEX campaigns**

**Kenneth E. Christian et al.**

*Correspondence to:* Kenneth E. Christian ([kenneth-christian@uiowa.edu](mailto:kenneth-christian@uiowa.edu))

The copyright of individual parts of the supplement might differ from the CC BY 4.0 License.

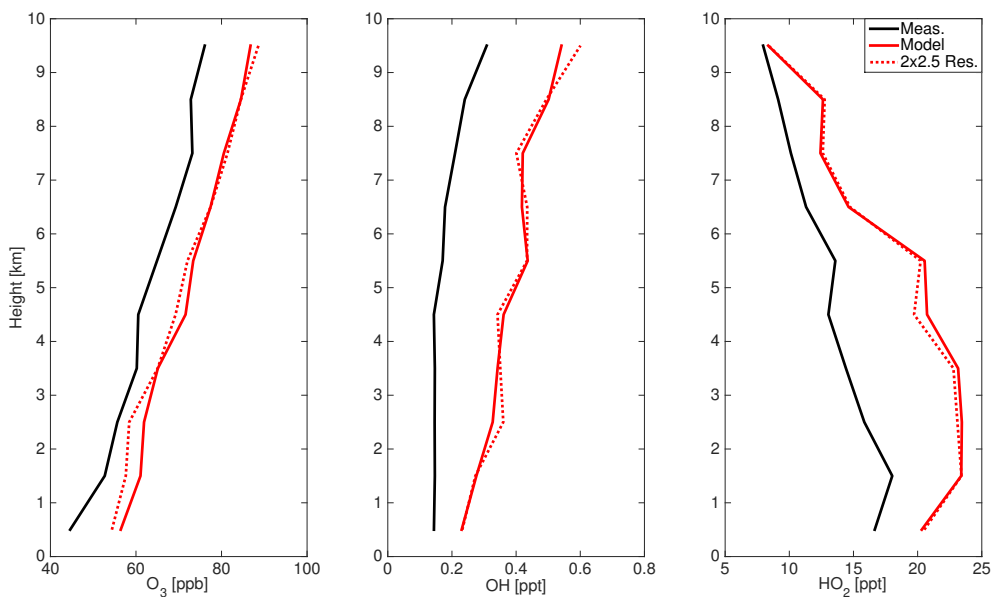

**Figure S 1.** Vertical profile for  $4^\circ \times 5^\circ$  median modeled (red solid),  $2^\circ \times 2.5^\circ$  median modeled (red dotted) and median measured (black)  $O_3$ , OH, and  $HO_2$  for INTEX-A flight data binned by kilometer.

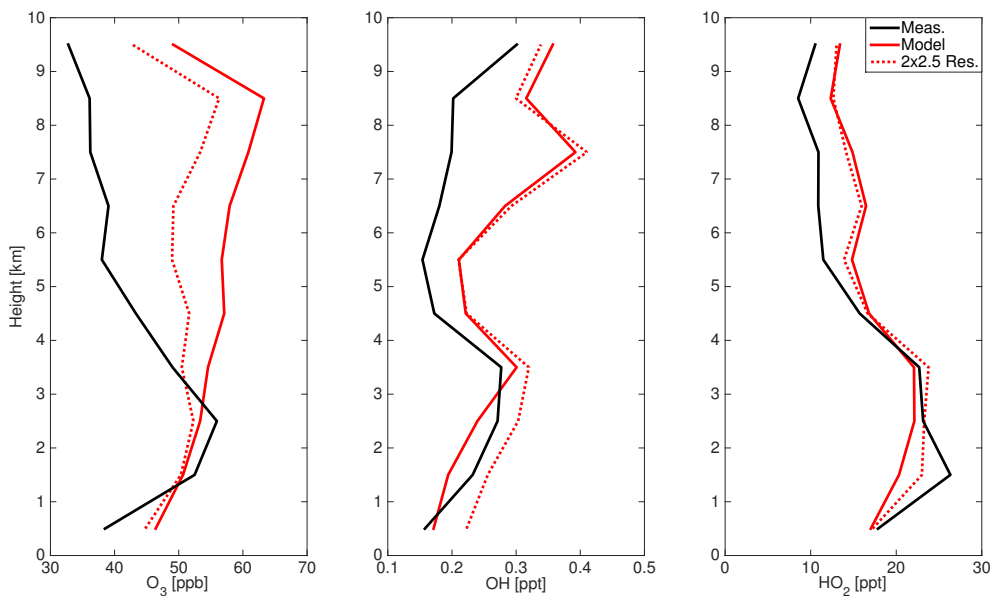

**Figure S 2.** Vertical profile for  $4^\circ \times 5d$  median modeled (red solid),  $2^\circ \times 2.5^\circ$  median modeled (red dotted) and median measured (black)  $O_3$ , OH, and  $HO_2$  for Houseon based INTEX-B flight data binned by kilometer.

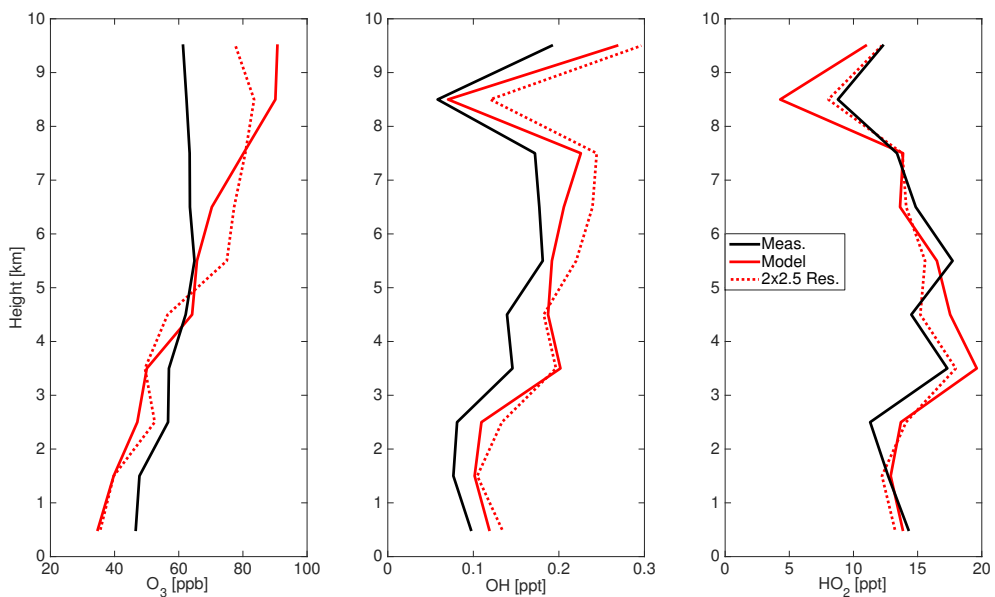

**Figure S 3.** Vertical profile for  $4^\circ \times 5^\circ$  median modeled (red solid),  $2^\circ \times 2.5^\circ$  median modeled (red dotted) and median measured (black)  $O_3$ , OH, and  $HO_2$  for Honolulu Based INTEX-B flight data binned by kilometer.

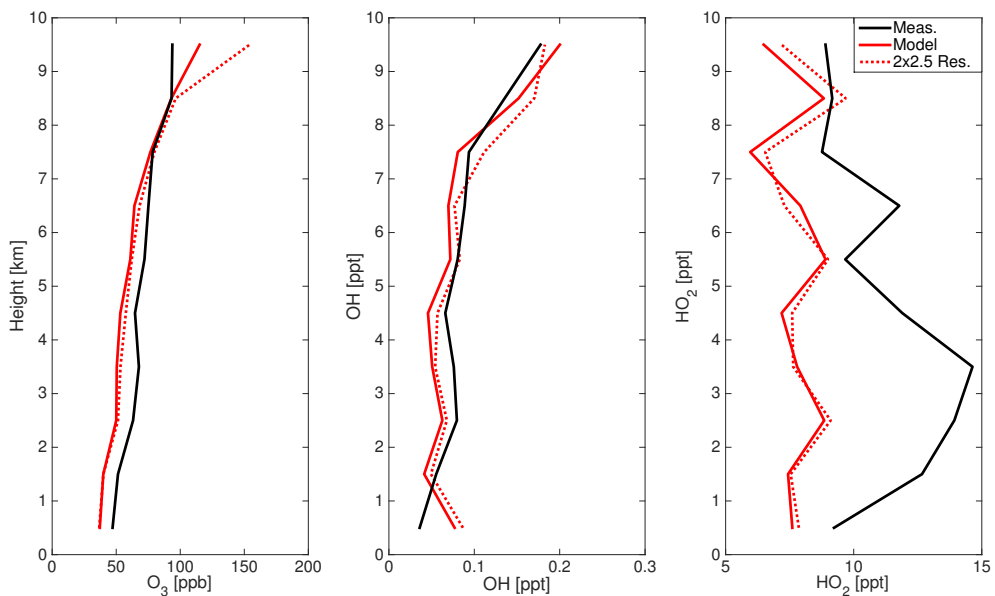

**Figure S 4.** Vertical profile for  $4^\circ \times 5^\circ$  median modeled (red solid),  $2^\circ \times 2.5^\circ$  median modeled (red dotted) and median measured (black)  $O_3$ , OH, and  $HO_2$  for Anchorage based INTEX-B flight data binned by kilometer.

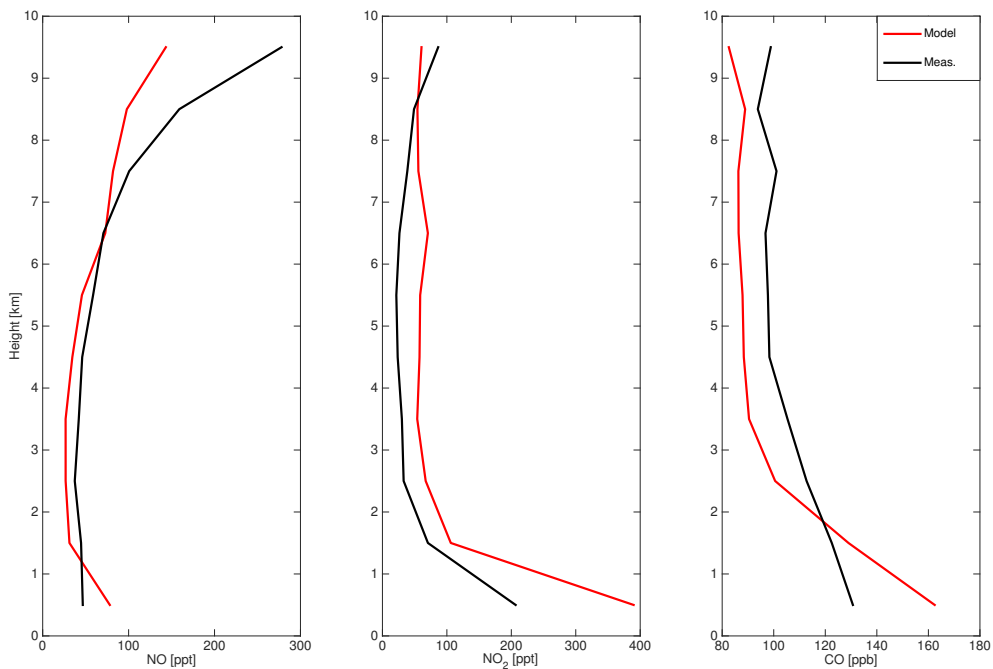

**Figure S 5.** Vertical profile for median modeled (red) and measured (black) NO, NO<sub>2</sub>, and CO for INTEX-A flight data binned by kilometer.

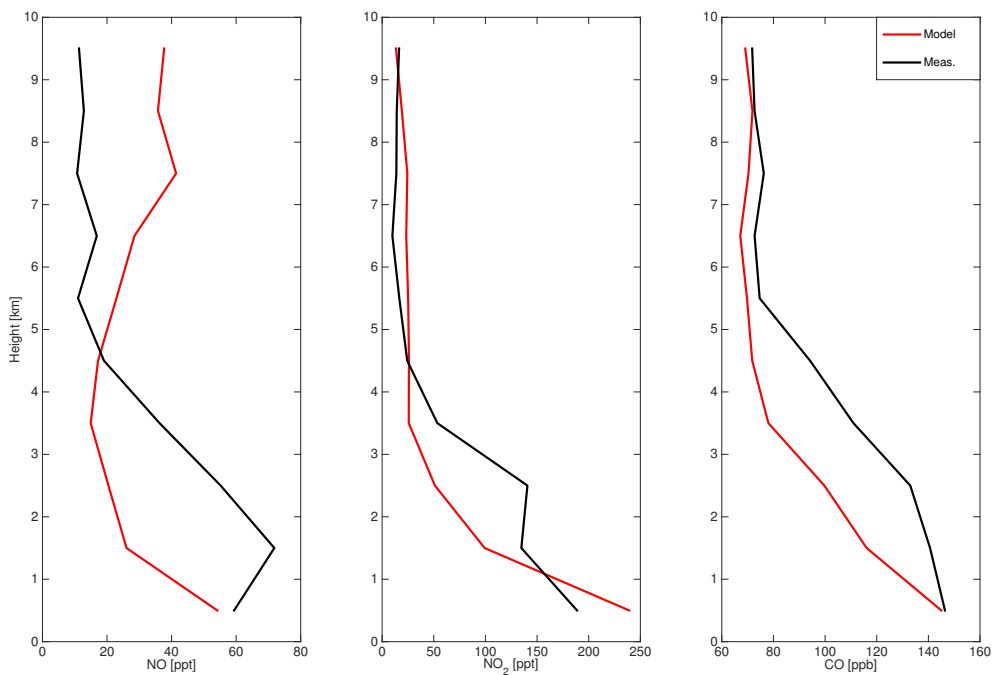

**Figure S 6.** Vertical profile for median modeled (red) and measured (black) NO, NO<sub>2</sub>, and CO for Houston based INTEX-B flight data binned by kilometer

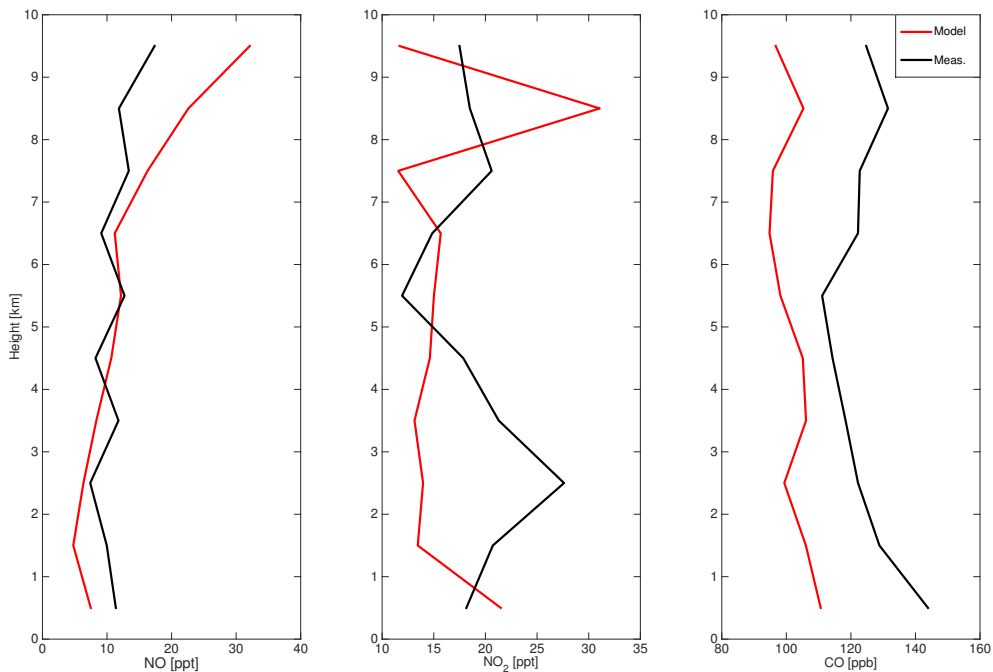

**Figure S 7.** Vertical profile for median modeled (red) and measured (black) NO, NO<sub>2</sub>, and CO for Honolulu based INTEX-B flight data binned by kilometer

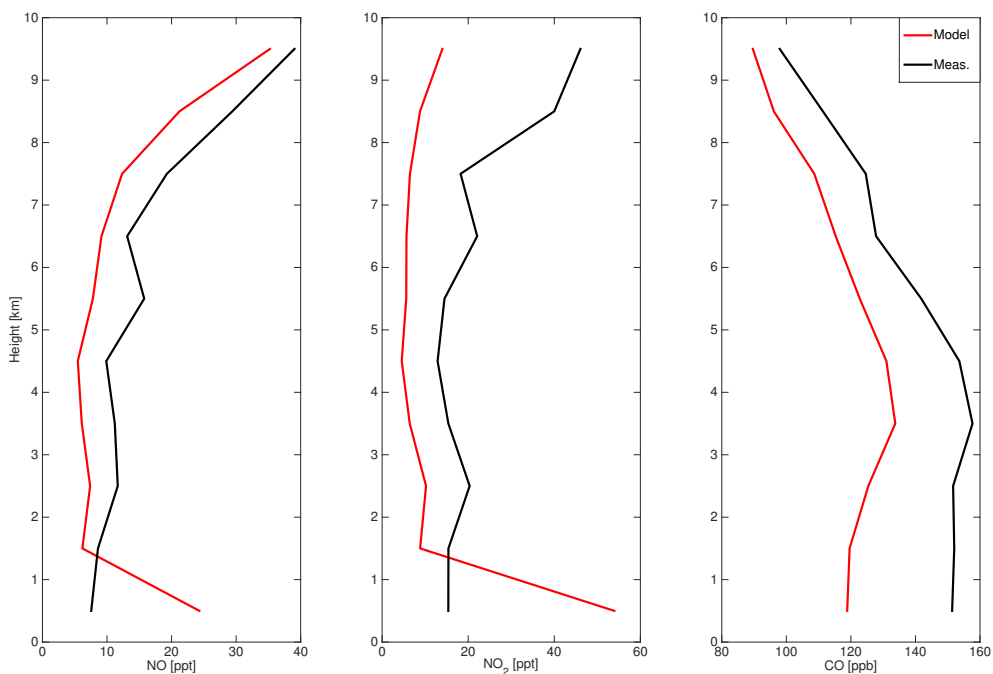

**Figure S 8.** Vertical profile for median modeled (red) and measured (black) NO, NO<sub>2</sub>, and CO for Anchorage based INTEX-B flight data binned by kilometer
